# Supplementary material
Source: publisher figshare collection journal article supplement (https://acs.figshare.com/ndownloader/files/5197027)
Supplement: Supplementary file 1 [file 5197027]

Supporting Information

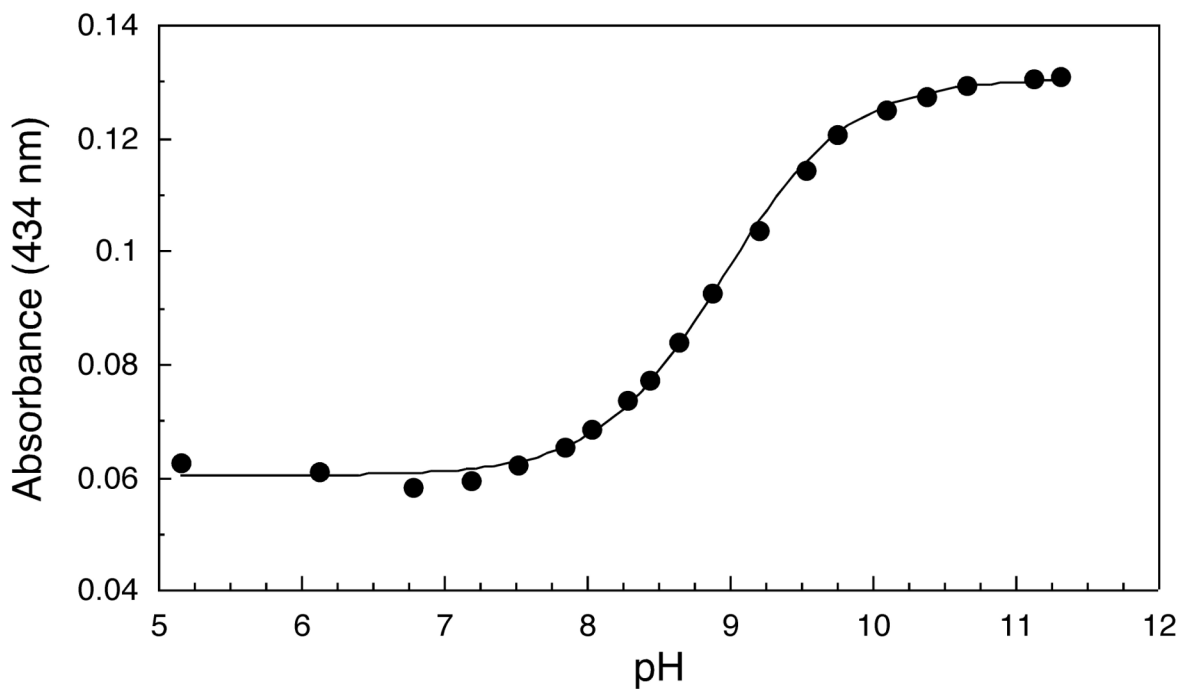

S1. pH-metric titration of Fusion-lip including **6b** at 20°C.

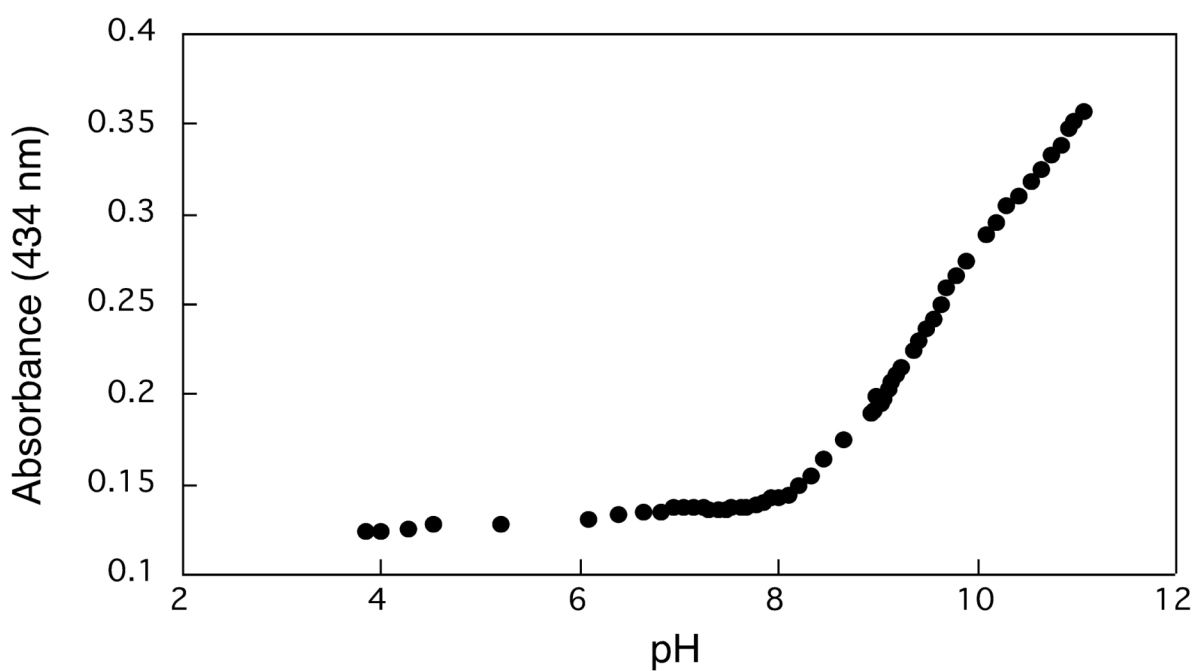

S2. pH-metric titration of Fusion-lip including **6a** at 20°C.
